# Supplementary material for: Intramolecular 5-endo-trig aminopalladation of β-hydroxy-γ-alkenylamine: efficient route to a pyrrolidine ring and its application for the synthesis of (−)-8,8a-di-epi-swainsonine
Source: Royal Society of Chemistry journal article supplement (doi:10.1039/c3ra45409f), 2013-11-14
Supplement: c3ra45409f.pdf [file c3ra45409f.pdf]

## Supporting Information

# **Intramolecular *5-endo*-Trig Aminopalladation of $\beta$ -hydroxy- $\gamma$ -alkenylamine: Efficient Route to a Pyrrolidine Ring and Its Application for the Synthesis of (-)-8,8a-di-*epi*-swainsonine**

Priyanka Singh, Gautam Panda\*

Medicinal and Process Chemistry Division, CSIR-Central Drug Research Institute,  
B.S. 10/1, Sector 10, Jankipuram Extension, Sitapur Road, Lucknow-226031, India

### **Table of contents**

|                    |         |
|--------------------|---------|
| NMR spectrum ..... | S2- S19 |
|--------------------|---------|

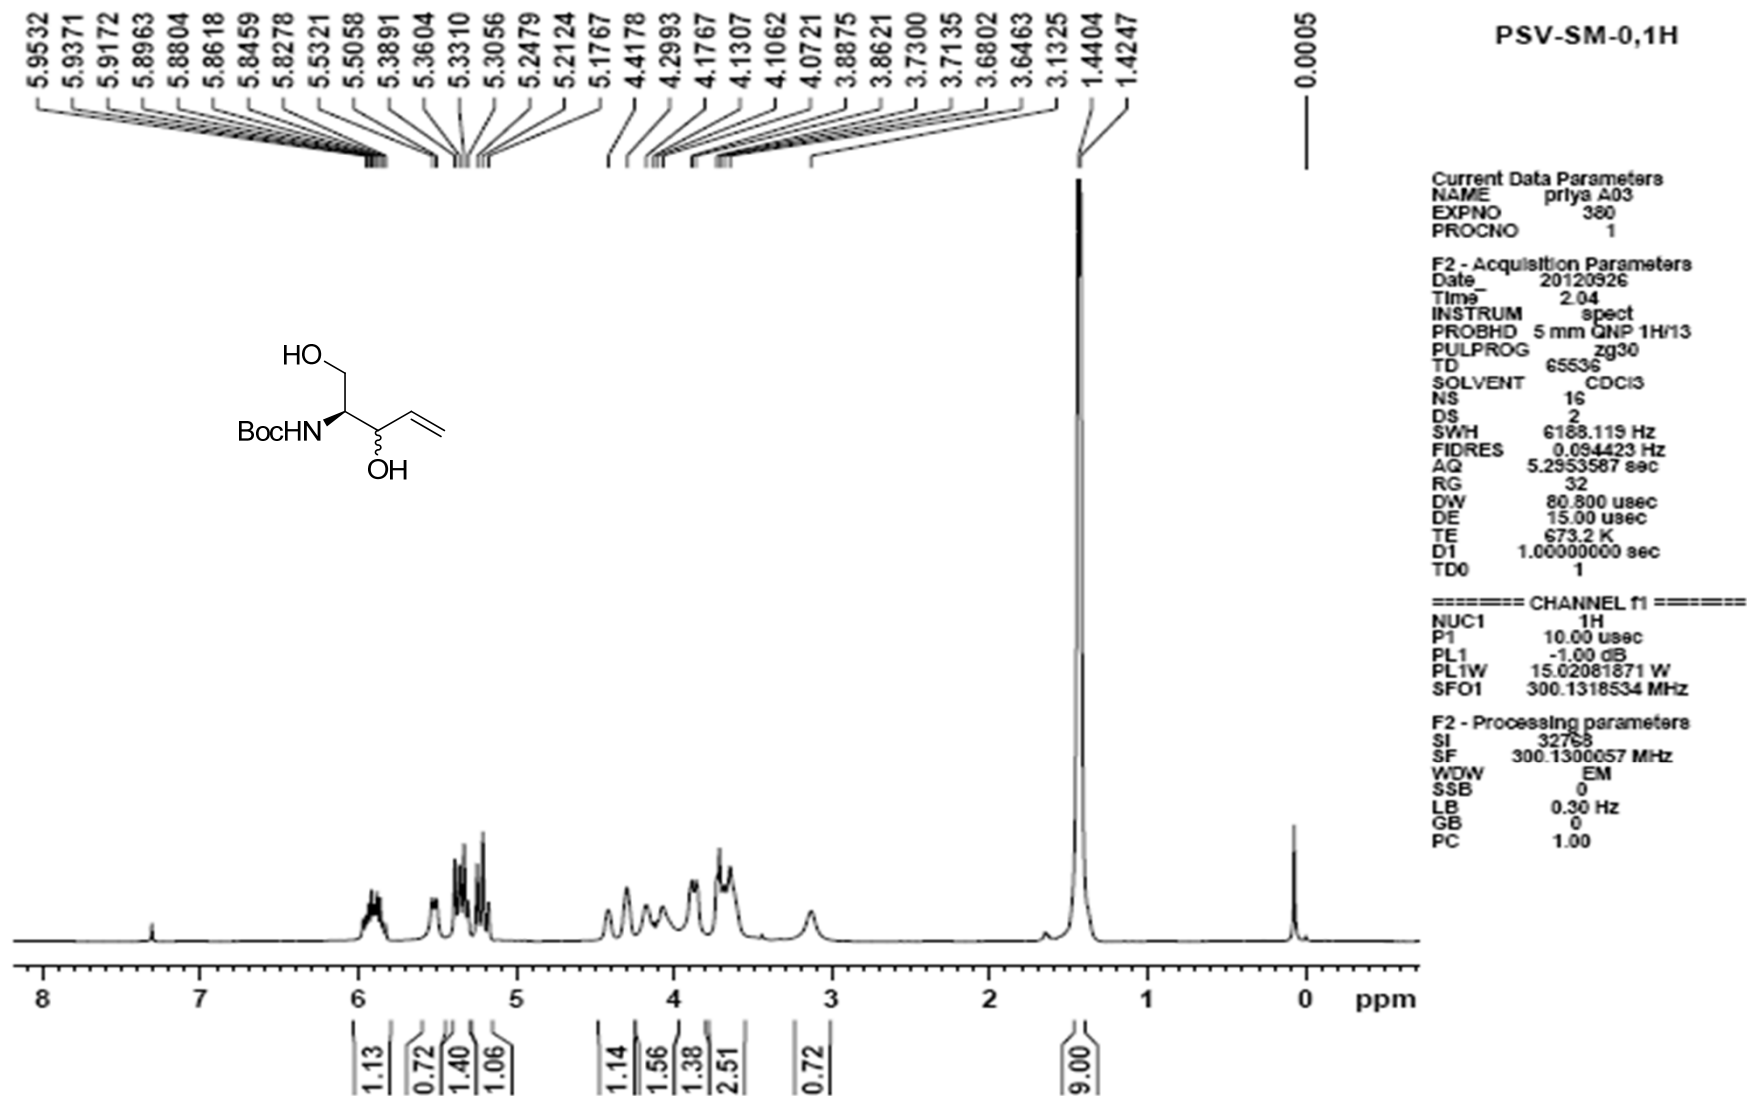

$^1\text{H}$  NMR spectrum of ( $\text{CDCl}_3$ ) of compound **8**

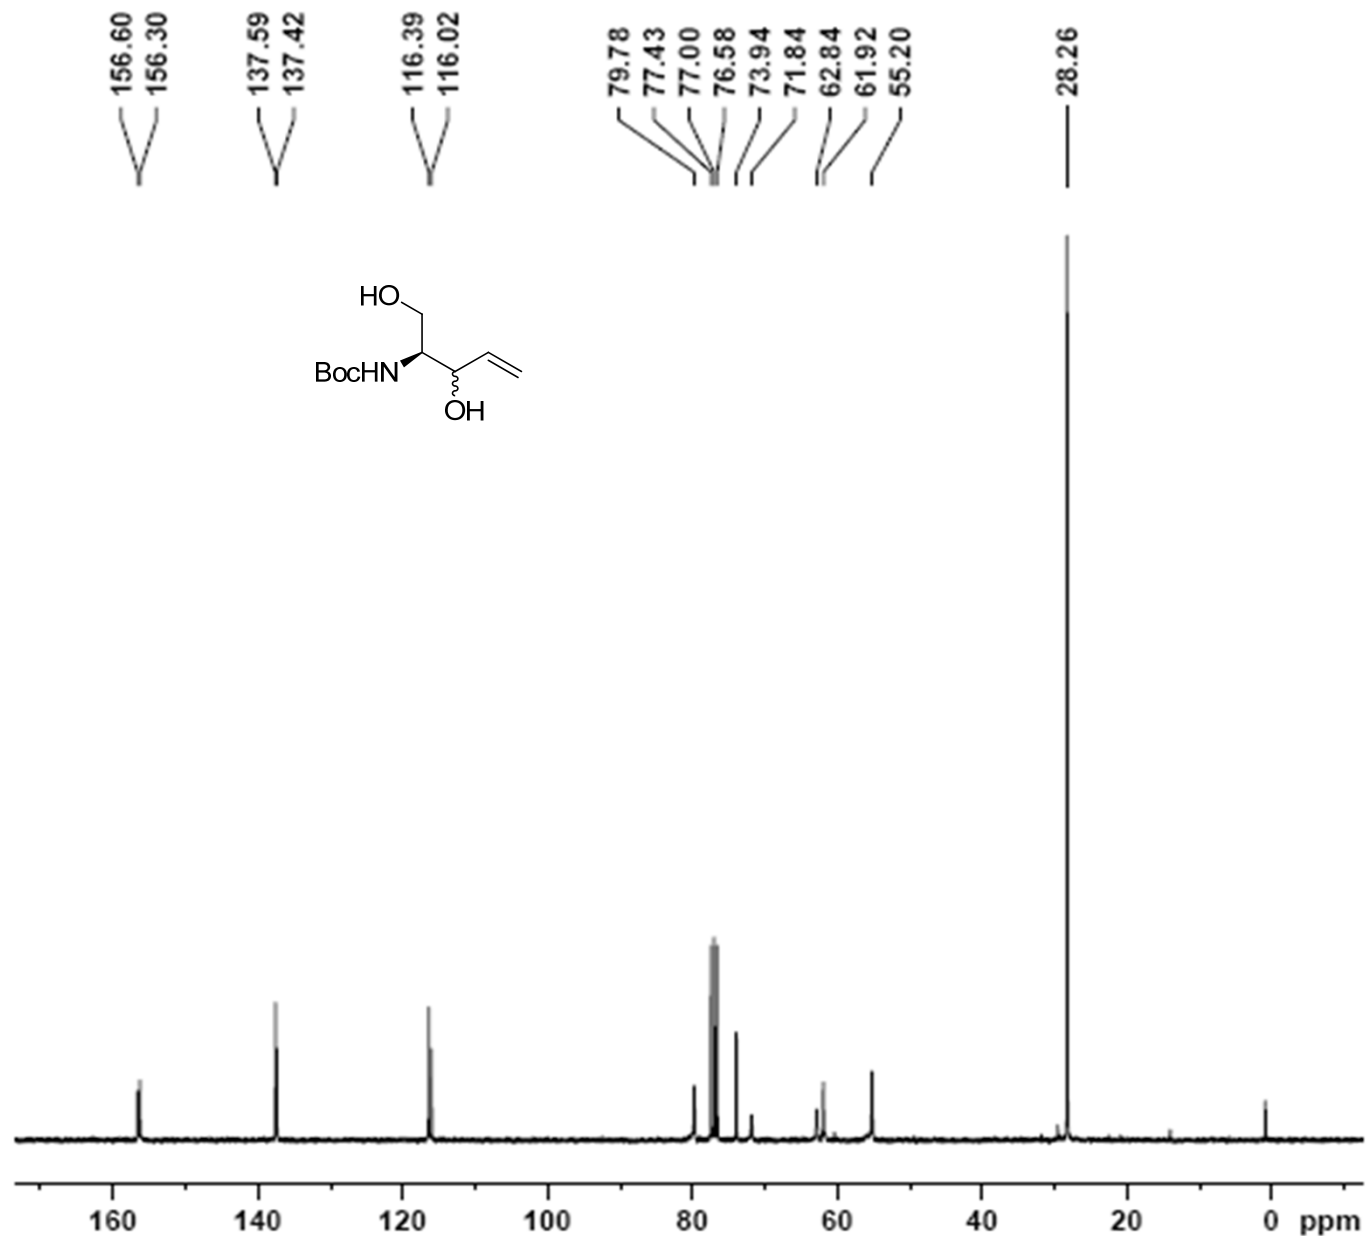

PSV-SM-0,13C

Current Data Parameter  
NAME swaln new  
EXPNO 480  
PROCNO 1

F2 - Acquisition Param  
Date\_ 20120930  
Time\_ 0.26  
INSTRUM spect  
PROBHD 5 mm QNP 1  
PULPROG zgpg30  
TD 65536  
SOLVENT CDCl3  
NS 512  
DS 4  
SWH 18028.846 H  
FIDRES 0.275098 H  
AQ 1.8175818 sec  
RG 2050  
DW 27.733 usec  
DE 15.00 usec  
TE 673.2 K  
D1 2.00000000 sec  
D11 0.03000000 sec  
TD0 1

==== CHANNEL f1  
NUC1 13C  
P1 8.15 usec  
PL1 -3.00 dB  
PL1W 55.13053616  
SFO1 75.4752953 M

==== CHANNEL f2  
CPDPRG2 waltz16  
NUC2 1H  
PCPD2 80.00 usec  
PL2 -1.00 dB  
PL12 17.06 dB  
PL13 21.00 dB  
PL2W 15.02081871  
PL12W 0.23479761  
PL13W 0.09477496  
SFO2 300.1312005

F2 - Processing param  
SI 32768

<sup>13</sup>C NMR spectrum of (CDCl<sub>3</sub>) of compound 8

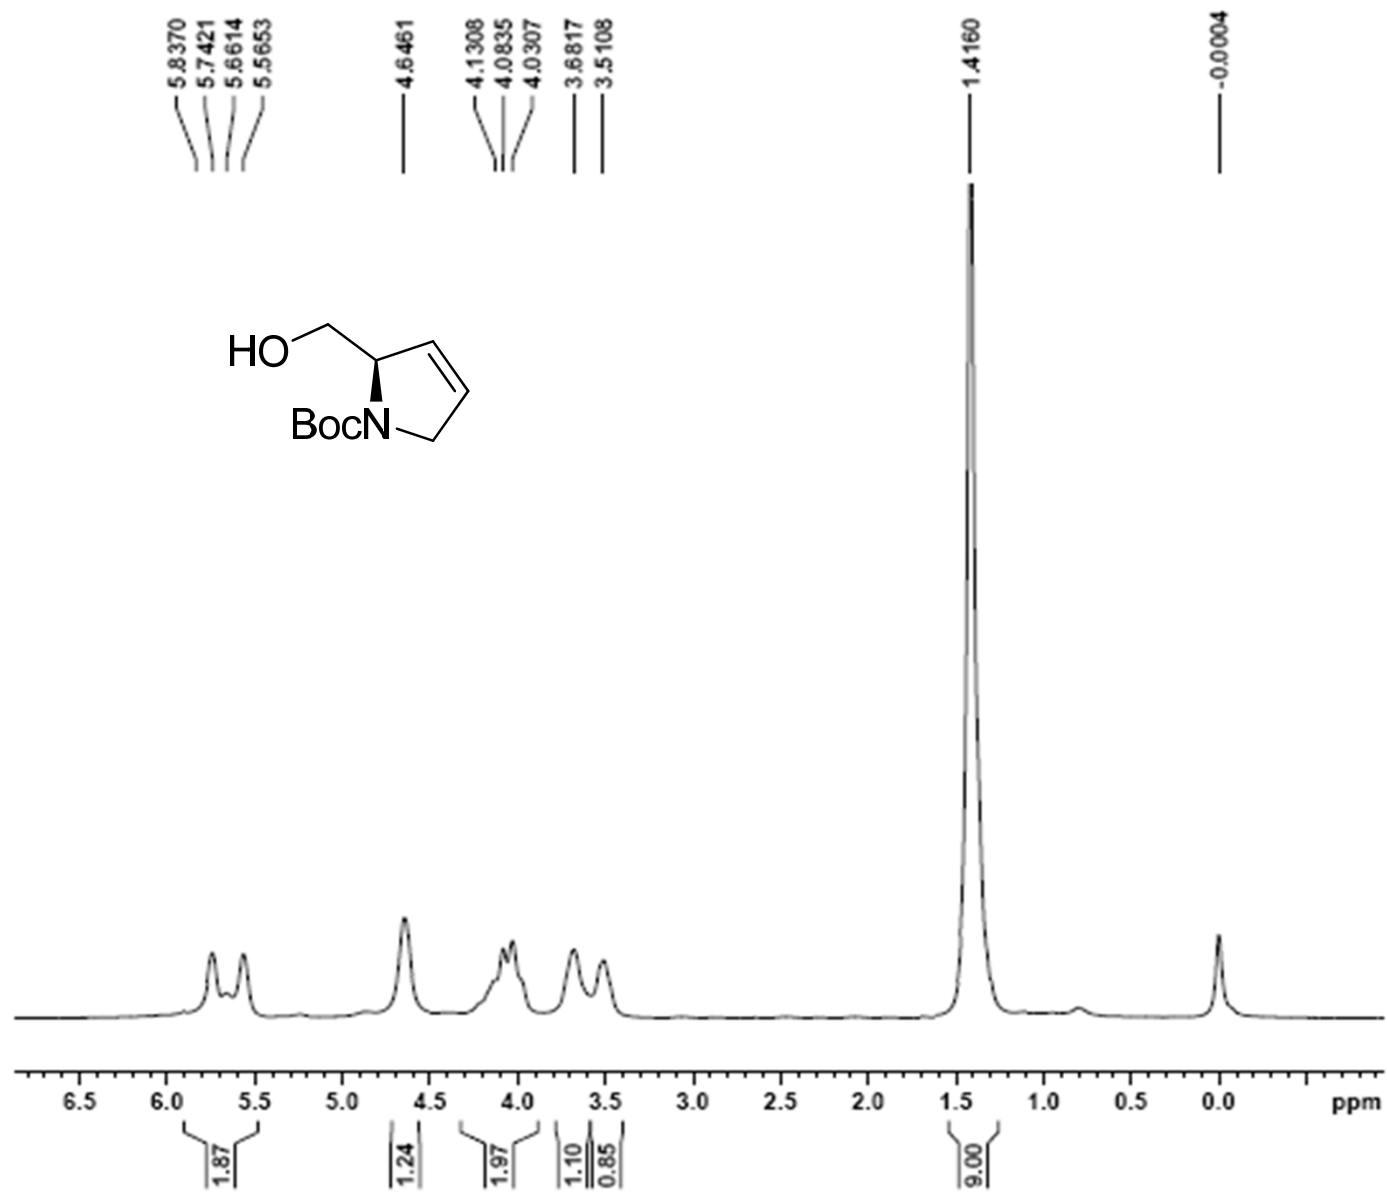

PSV-L-10,1H

Current Data Parameters  
NAME priya A03  
EXPNO 400  
PROCNO 1

F2 - Acquisition Parameters  
Date\_ 20120526  
Time\_ 2.18  
INSTRUM spect  
PROBHD 5 mm QNP 1H/13  
PULPROG zg30  
TD 65536  
SOLVENT CDCl3  
NS 16  
DS 2  
SWH 6188.119 Hz  
FIDRES 0.094423 Hz  
AQ 5.2953587 sec  
RG 45.2  
DW 80.800 usec  
DE 15.00 usec  
TE 673.2 K  
D1 1.0000000 sec  
TD0 1

===== CHANNEL f1 =====  
NUC1 1H  
P1 10.00 usec  
PL1 -1.00 dB  
PL1W 15.02081871 W  
SFO1 300.1318534 MHz

F2 - Processing parameters  
SI 32768  
SF 300.1300540 MHz  
WDW EM  
SSB 0  
LB 0.30 Hz  
GB 0  
PC 1.00

<sup>1</sup>H NMR spectrum (CDCl<sub>3</sub>) of compound 6

S4

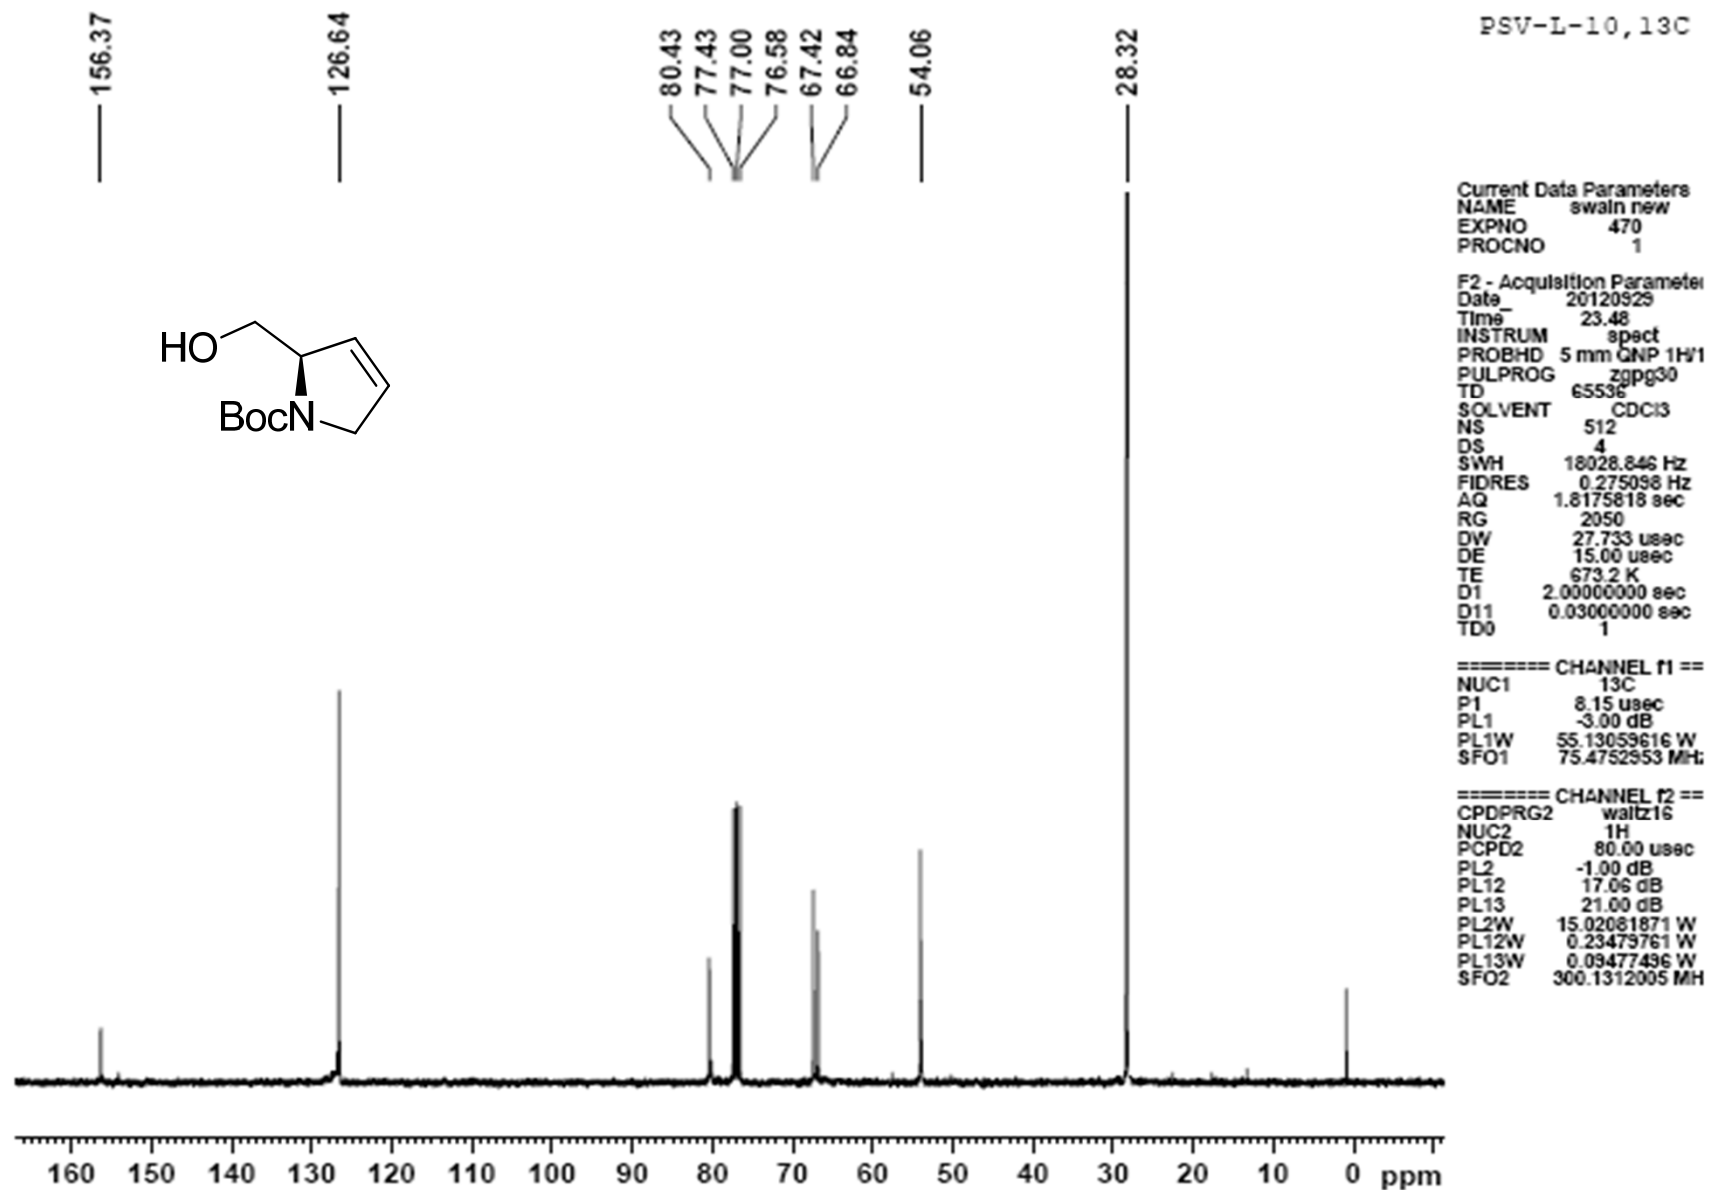

$^{13}\text{C}$  NMR spectrum ( $\text{CDCl}_3$ ) of compound **6**

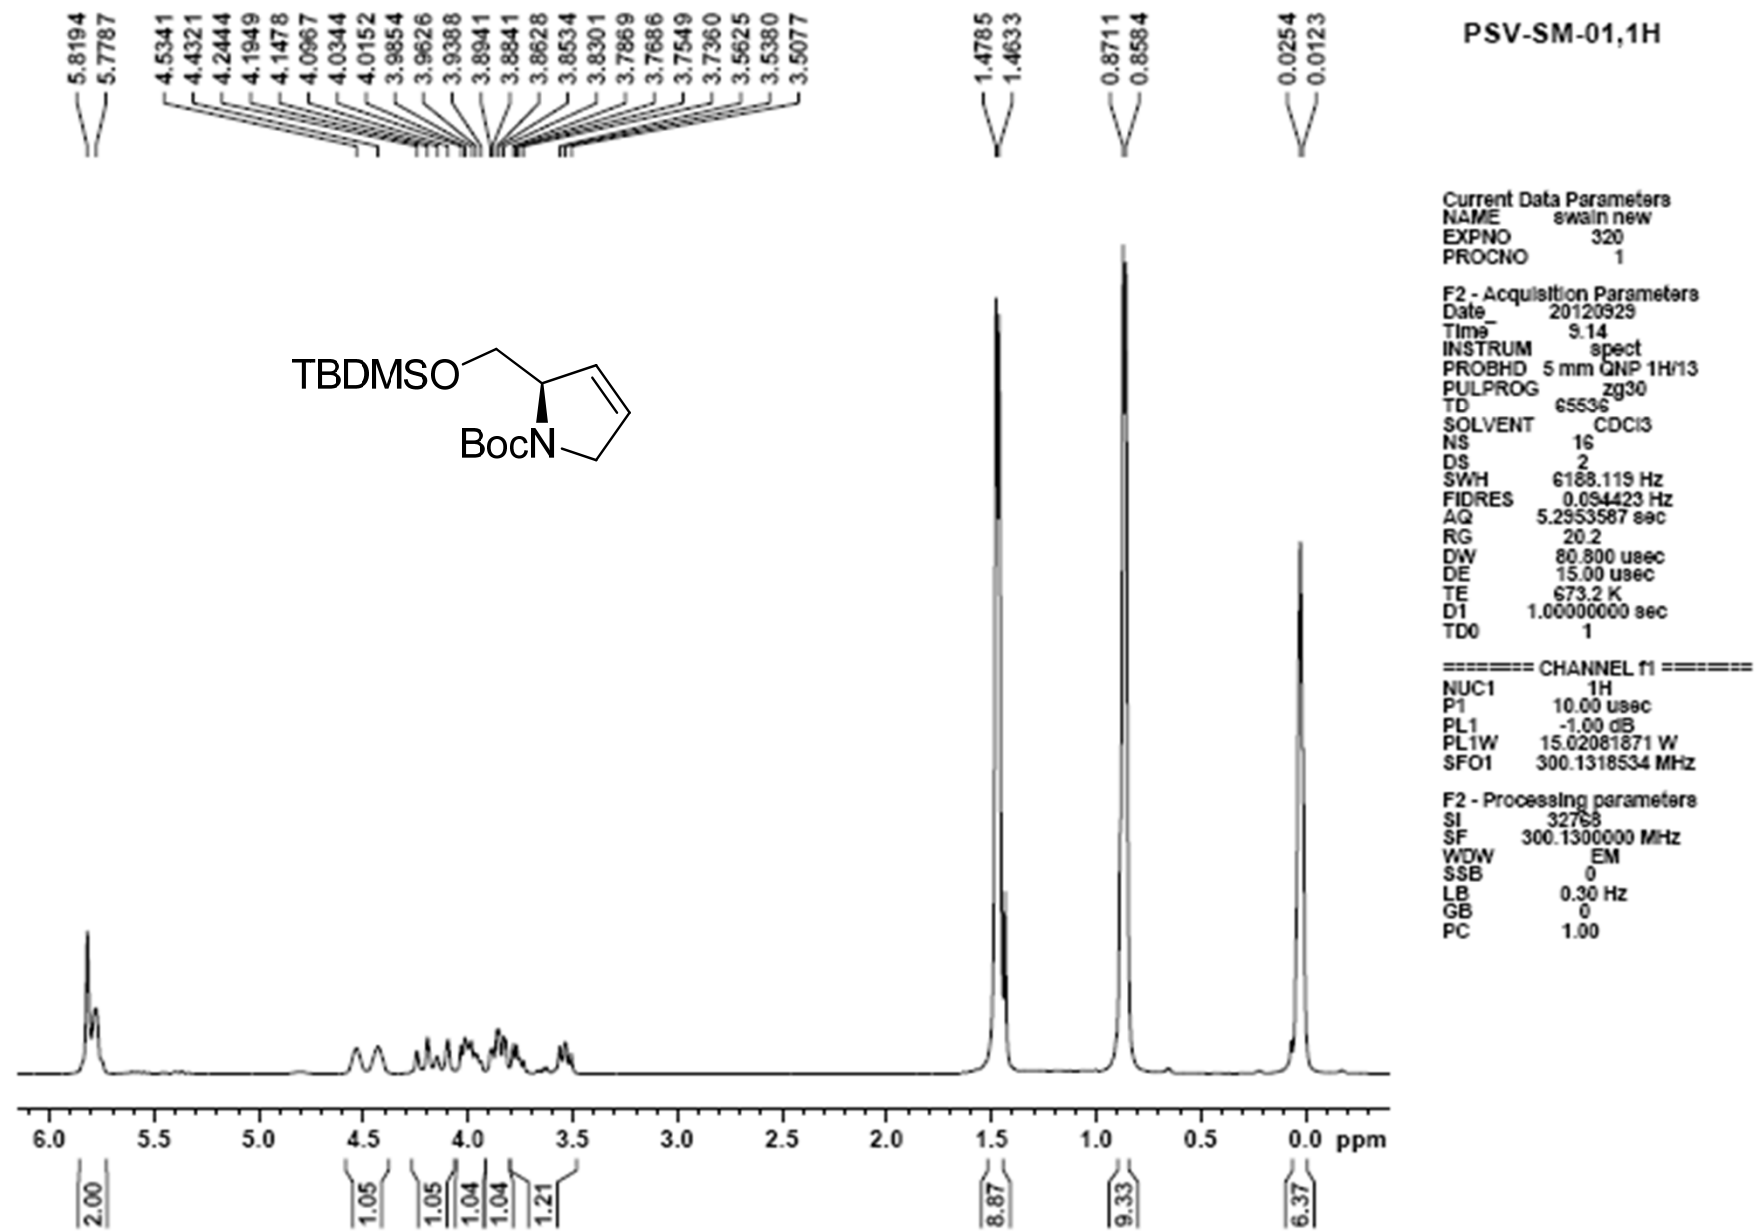

<sup>1</sup>H NMR spectrum (CDCl<sub>3</sub>) of compound 9

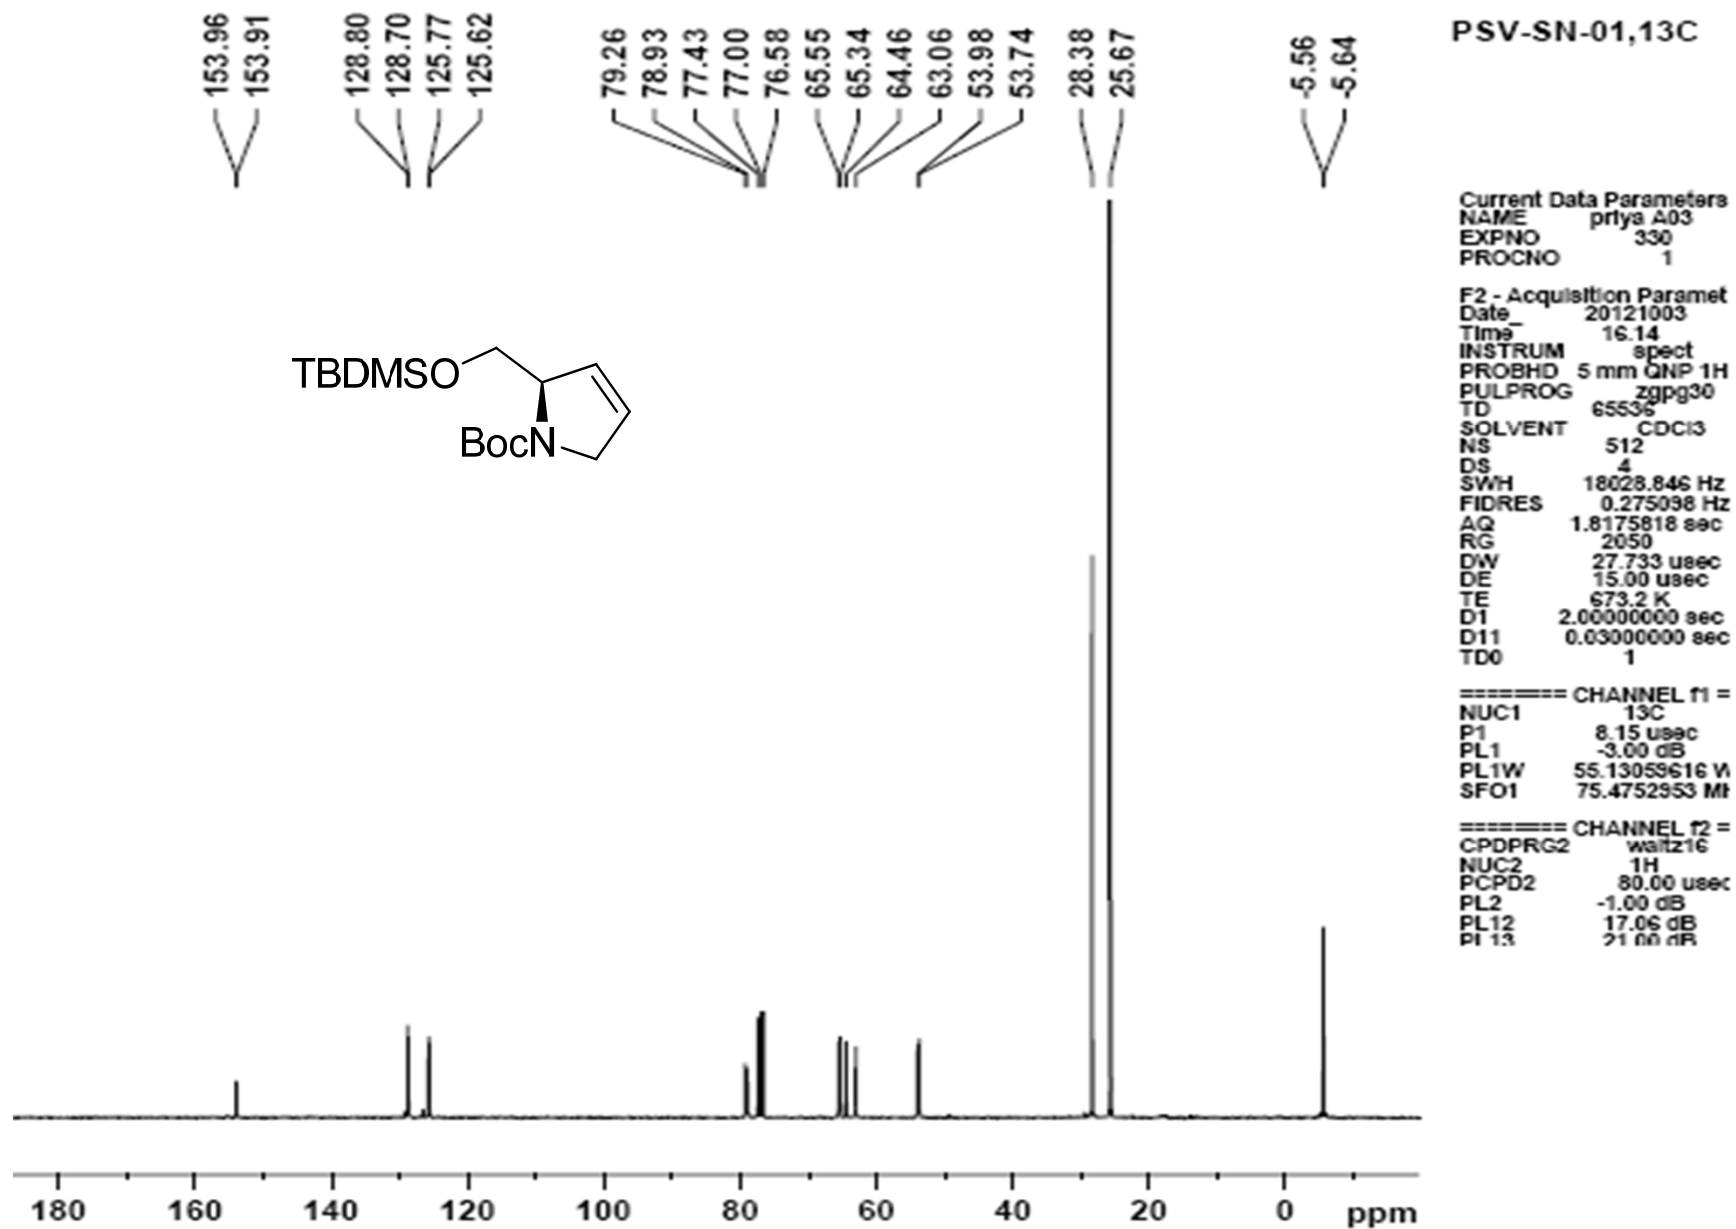

$^{13}\text{C}$  NMR spectrum ( $\text{CDCl}_3$ ) of compound **9**

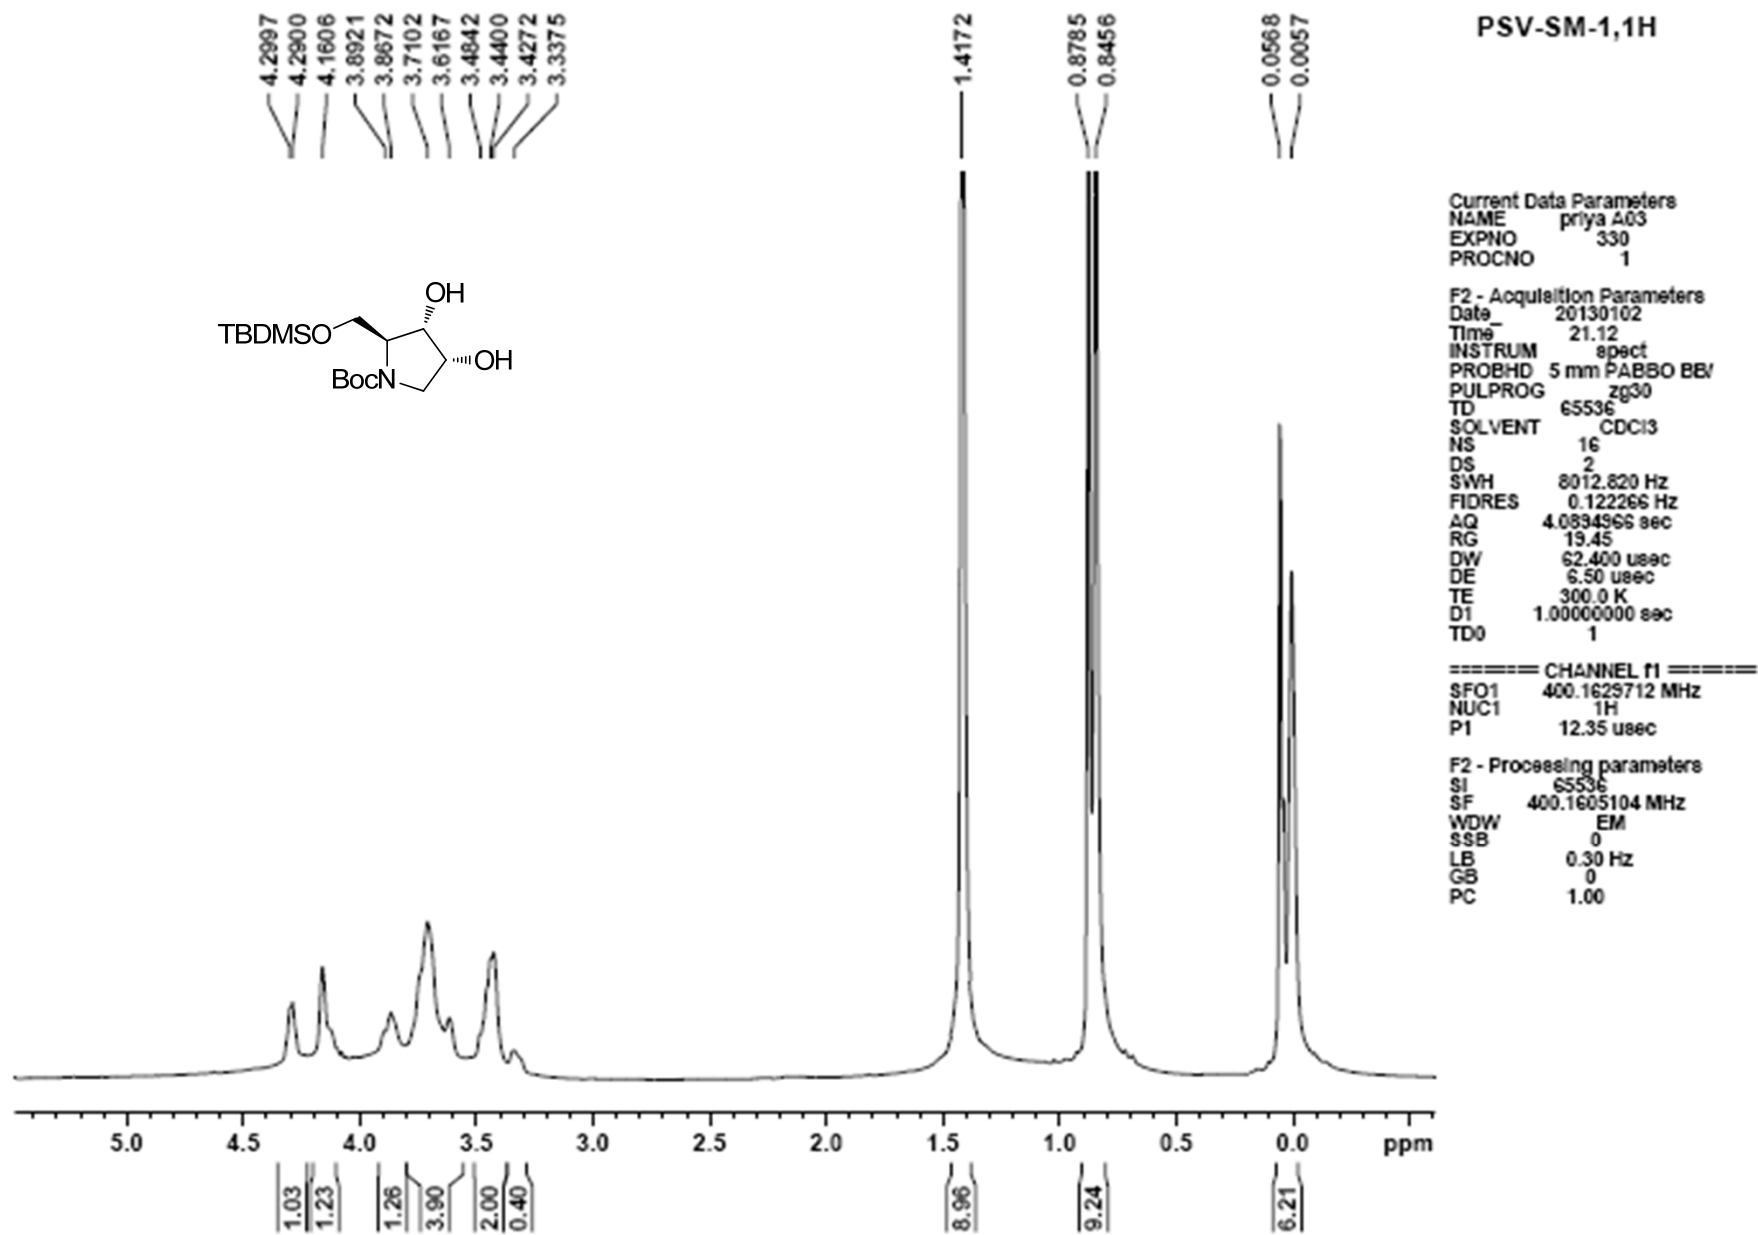

<sup>1</sup>H NMR spectrum (CDCl<sub>3</sub>) of compound **10**



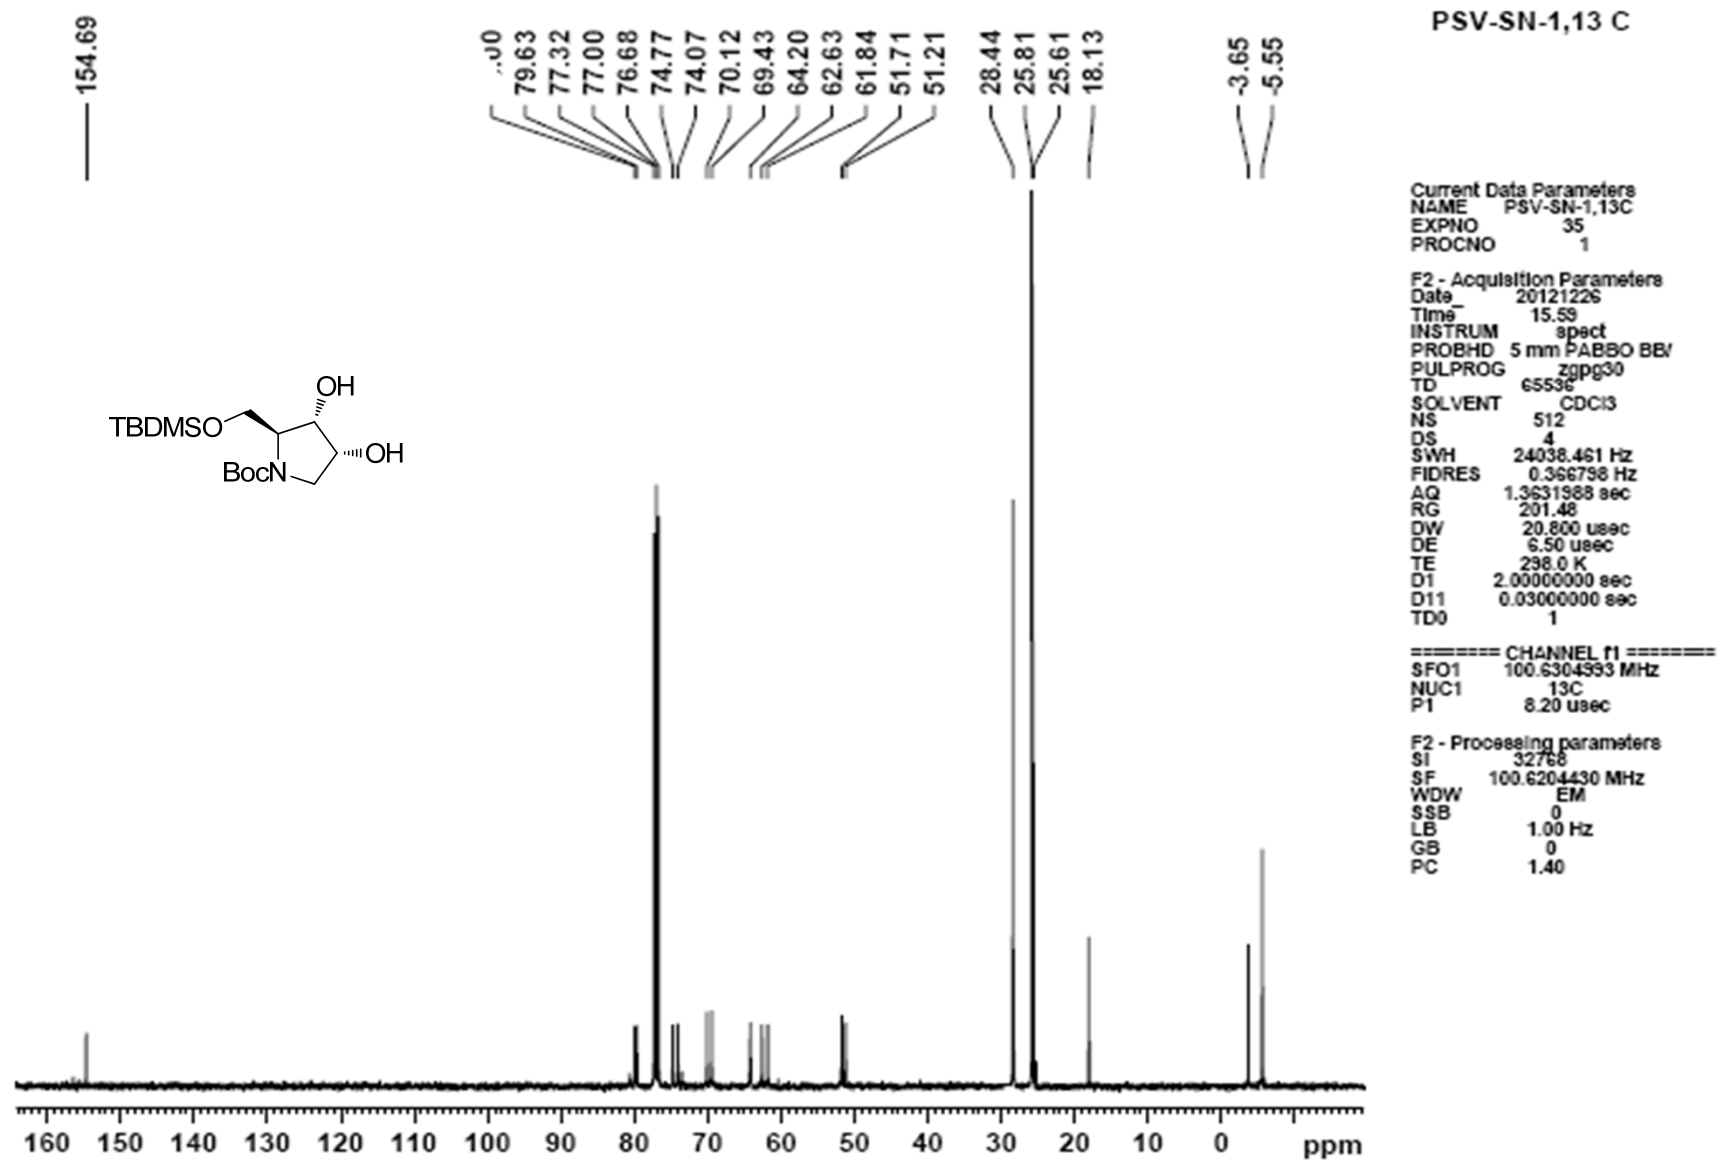

$^{13}\text{C}$  NMR spectrum ( $\text{CDCl}_3$ ) of compound **10**  
S9

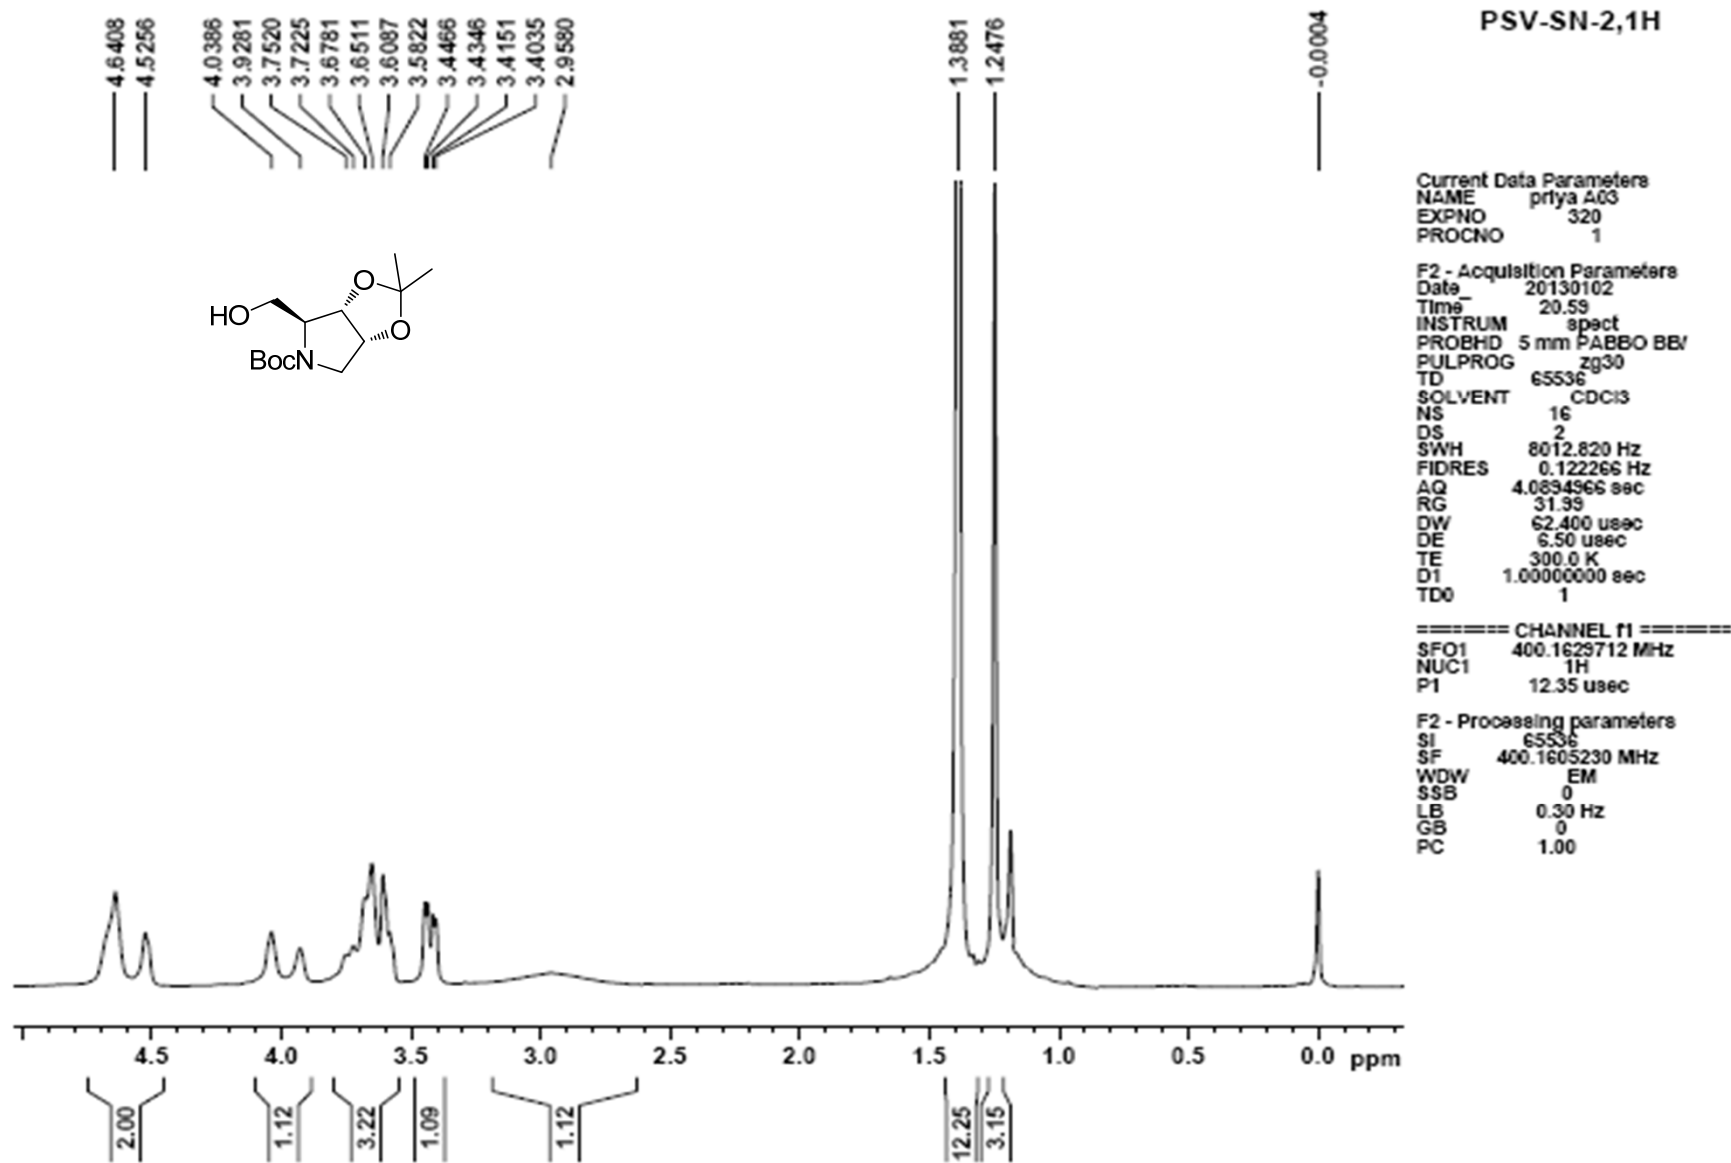

<sup>1</sup>H NMR spectrum (CDCl<sub>3</sub>) of compound **11**  
S10

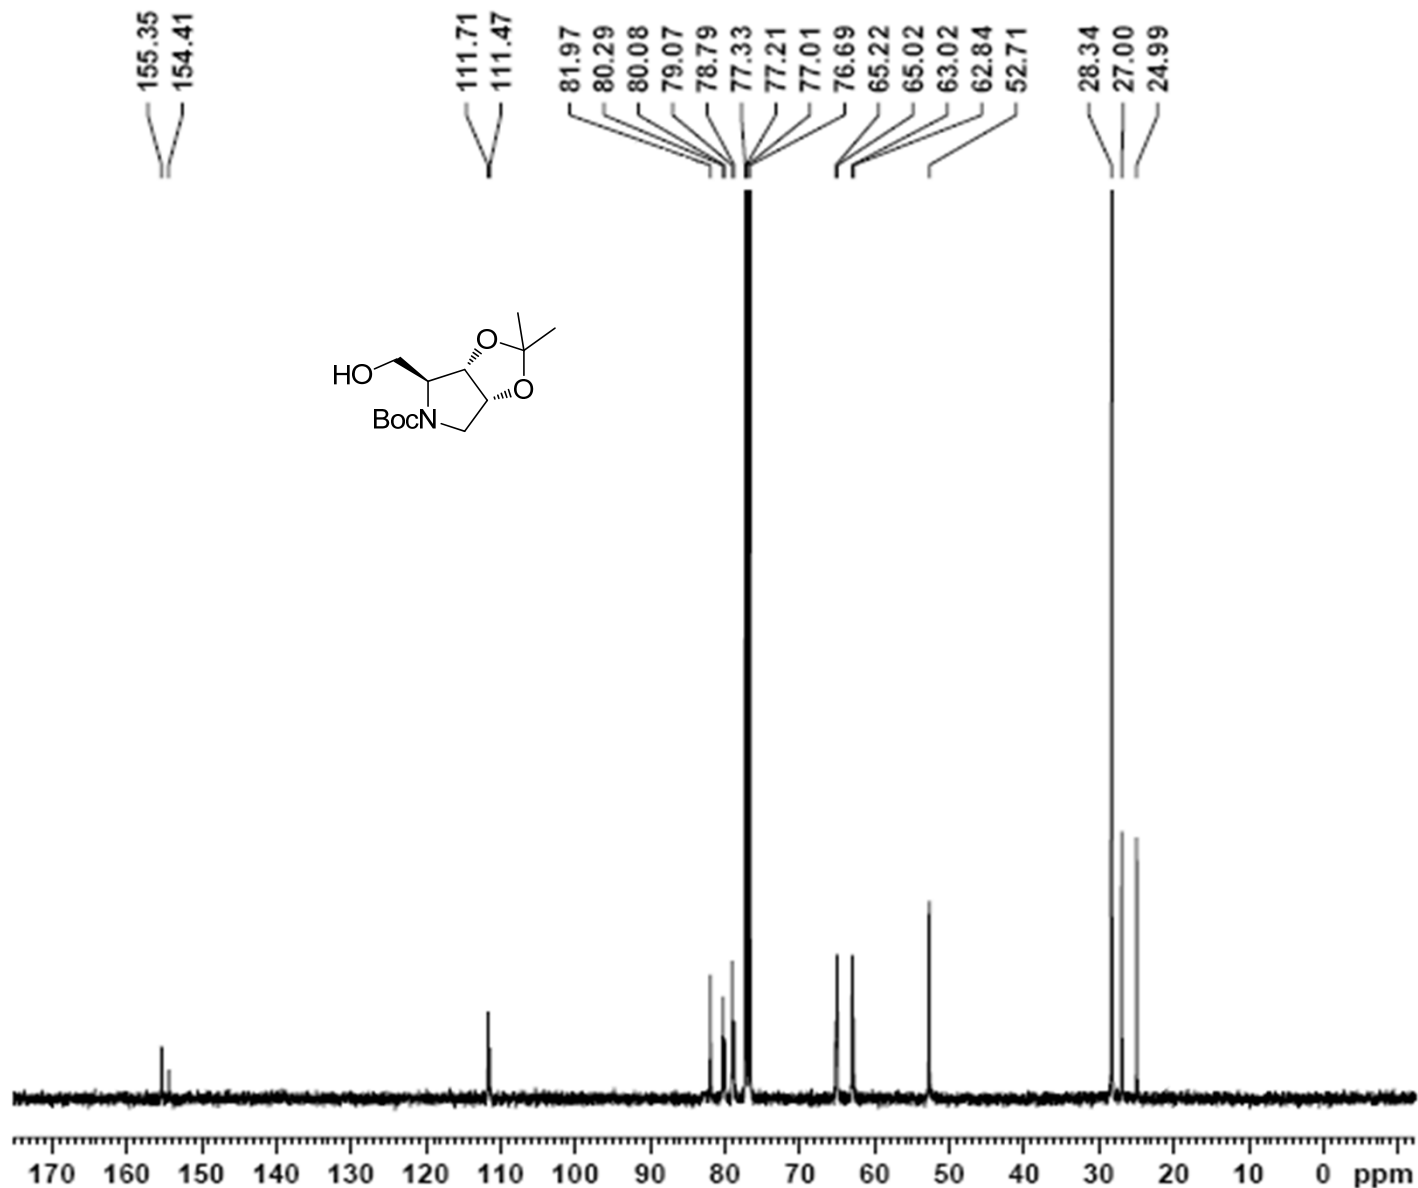

PSV-SN-2,13 C

Current Data Parameters  
NAME PSV-SN-2.13C  
EXPNO 36  
PROCNO 1

F2 - Acquisition Parameters  
Date\_ 20121226  
Time\_ 11.29  
INSTRUM spect  
PROBHD 5 mm PABBO BB/  
PULPROG zgpg30  
TD 65536  
SOLVENT CDCl3  
NS 512  
DS 4  
SWH 24038.461 Hz  
FIDRES 0.366798 Hz  
AQ 1.3631988 sec  
RG 201.48  
DW 20.800 usec  
DE 6.50 usec  
TE 298.0 K  
D1 2.00000000 sec  
D11 0.03000000 sec  
TD0 1

===== CHANNEL f1 =====  
SFO1 100.6304993 MHz  
NUC1 13C  
P1 8.20 usec

F2 - Processing parameters  
SI 32768  
SF 100.6204431 MHz  
WDW EM  
SSB 0  
LB 1.00 Hz  
GB 0  
PC 1.40

<sup>13</sup>C NMR spectrum (CDCl<sub>3</sub>) of compound 11  
S11

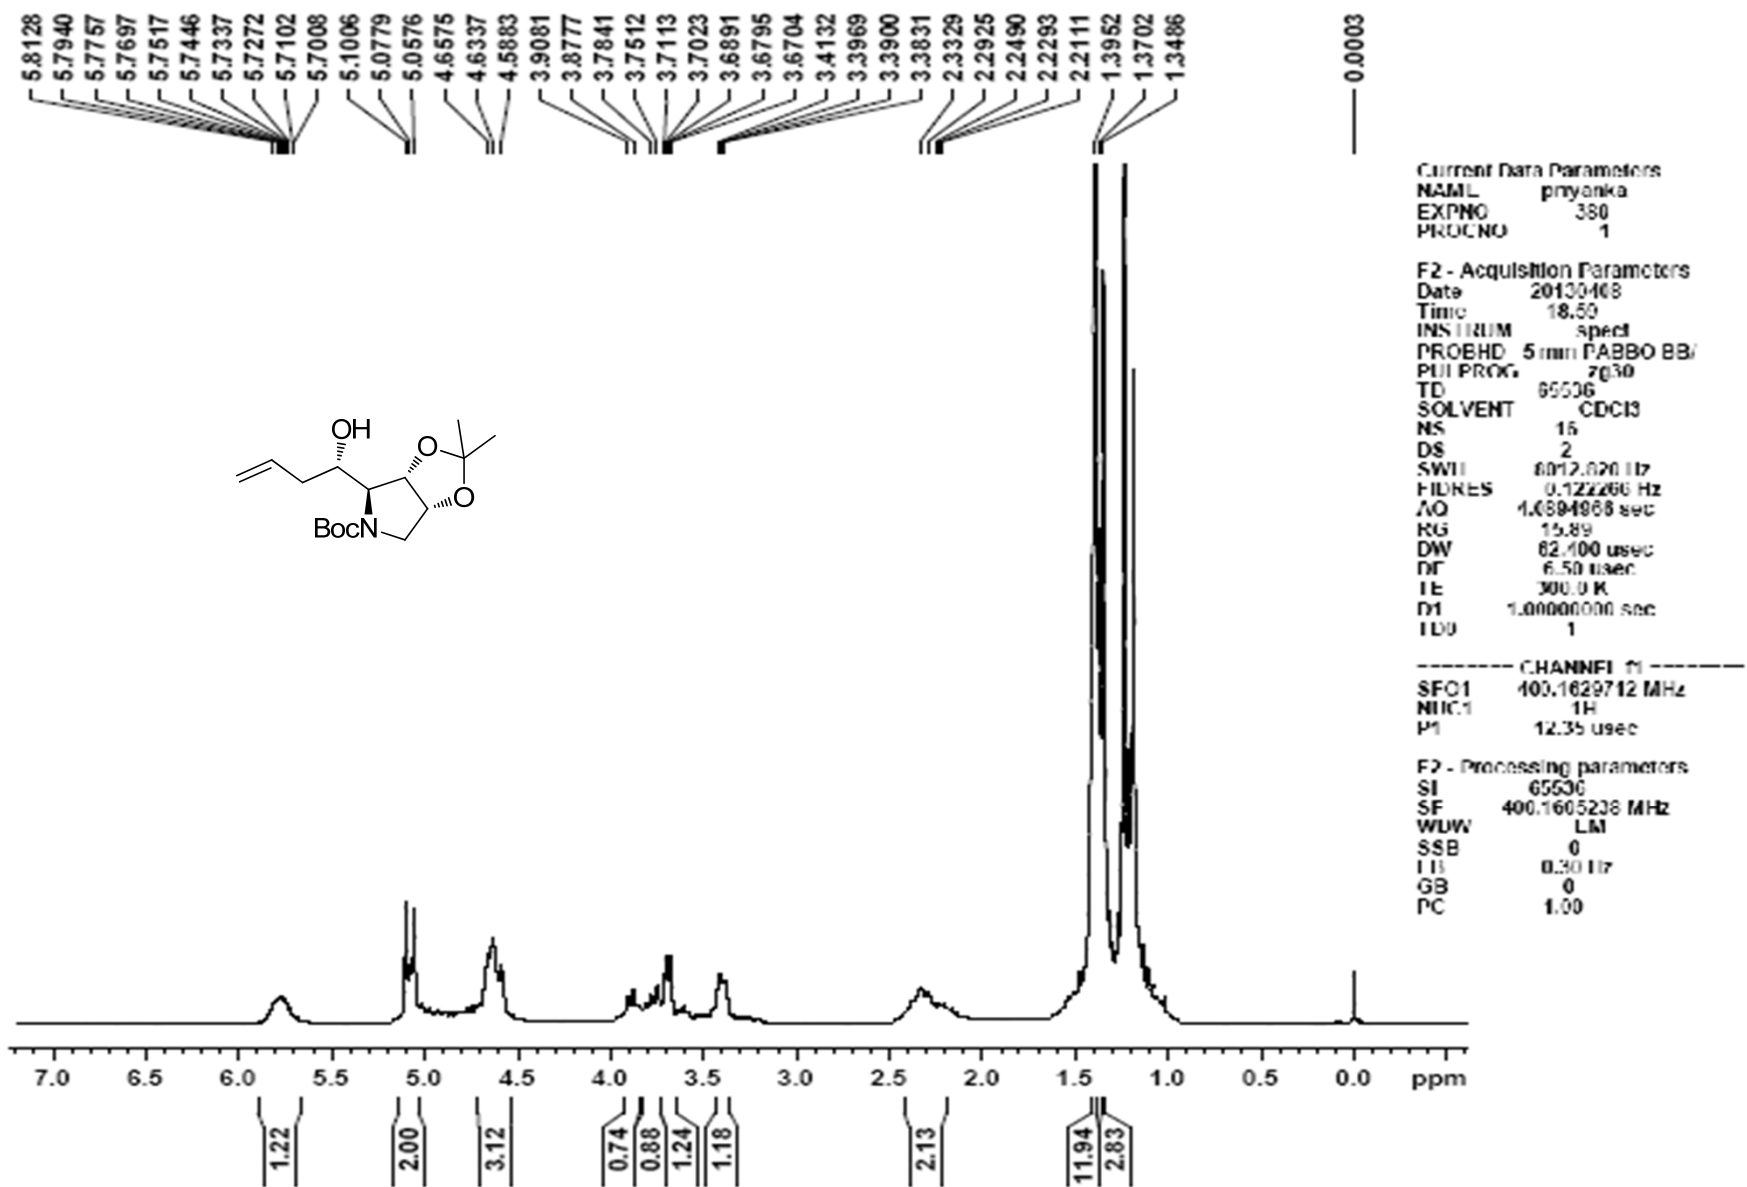

<sup>1</sup>H spectrum (CDCl<sub>3</sub>) of compound 13

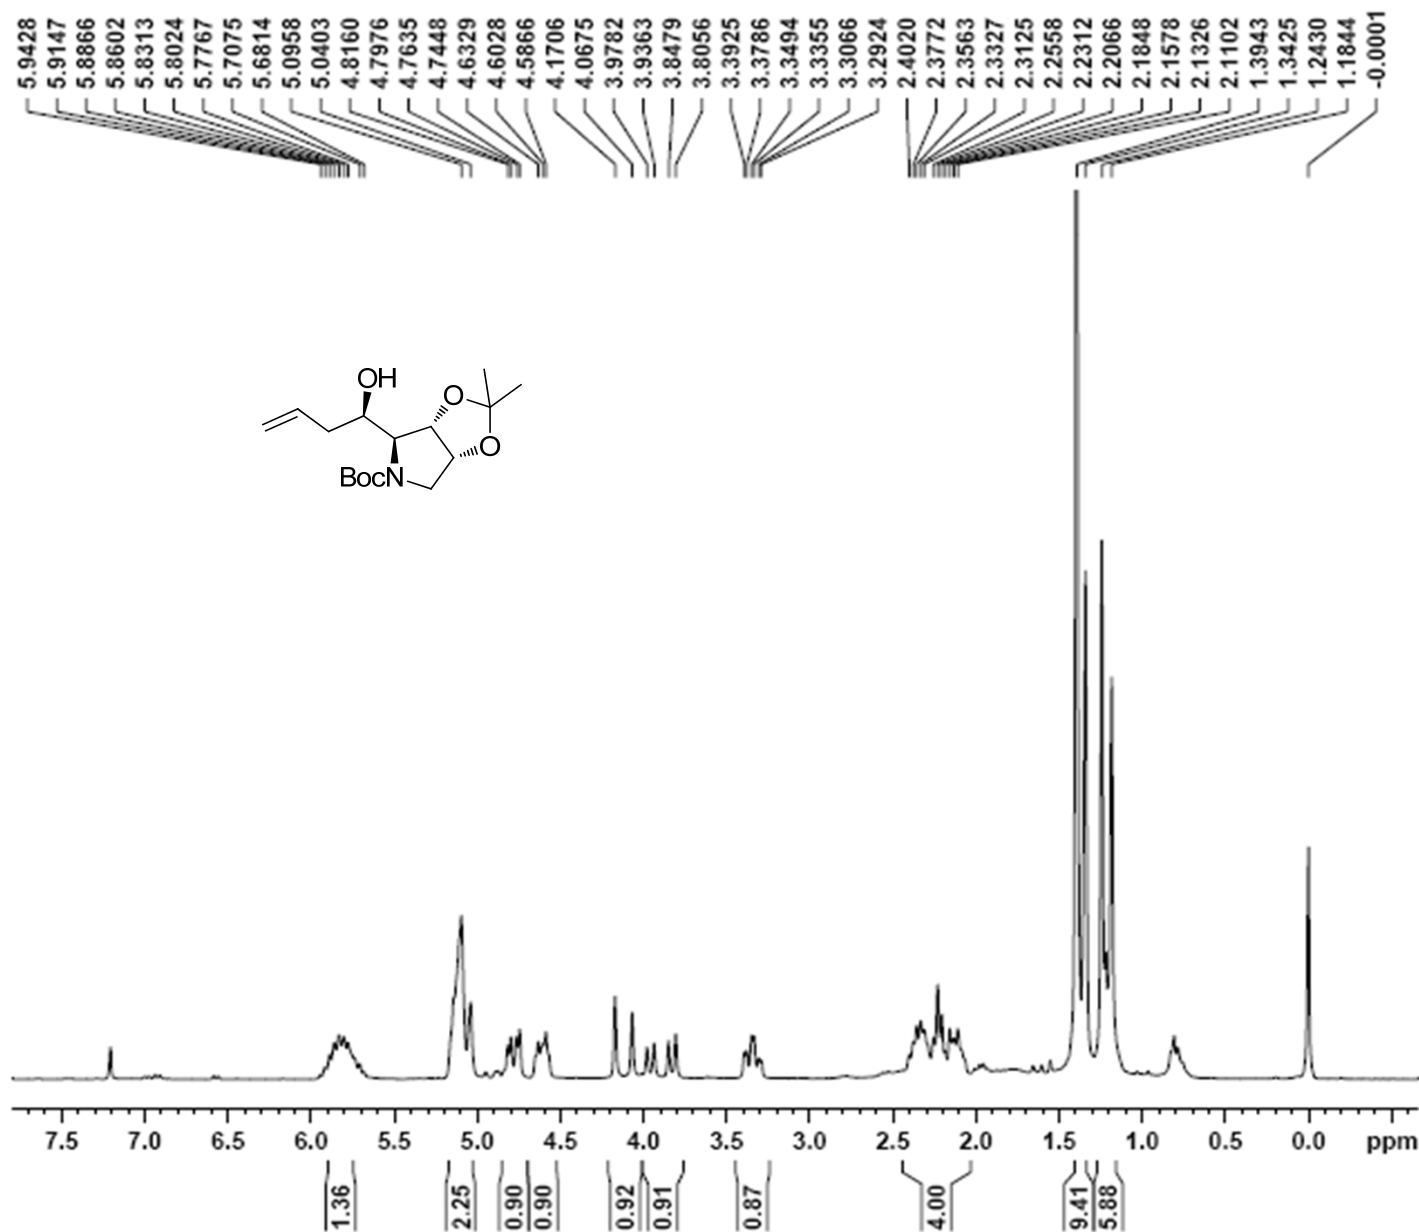

Current Data Parameters  
NAME priya A03  
EXPNO 360  
PROCNO 1

F2 - Acquisition Parameters  
Date\_ 20130118  
Time 7.19  
INSTRUM spect  
PROBHD 5 mm QNP 1H/13  
PULPROG zg30  
TD 65536  
SOLVENT CDCl3  
NS 8  
DS 0  
SWH 7211.539 Hz  
FIDRES 0.110039 Hz  
AQ 4.5438795 sec  
RG 50.8  
DW 69.333 usec  
DE 15.00 usec  
TE 673.2 K  
D1 1.00000000 sec  
TD0 1

===== CHANNEL f1 =====  
NUC1 1H  
P1 10.00 usec  
PL1 -1.00 dB  
PL1W 15.02081871 W  
SFO1 300.1318534 MHz

F2 - Processing parameters  
SI 32768  
SF 300.1300235 MHz  
WDW EM  
SSB 0  
LB 0.30 Hz  
GB 0  
PC 1.00

<sup>1</sup>H NMR spectrum (CDCl<sub>3</sub>) of compound 14

S13

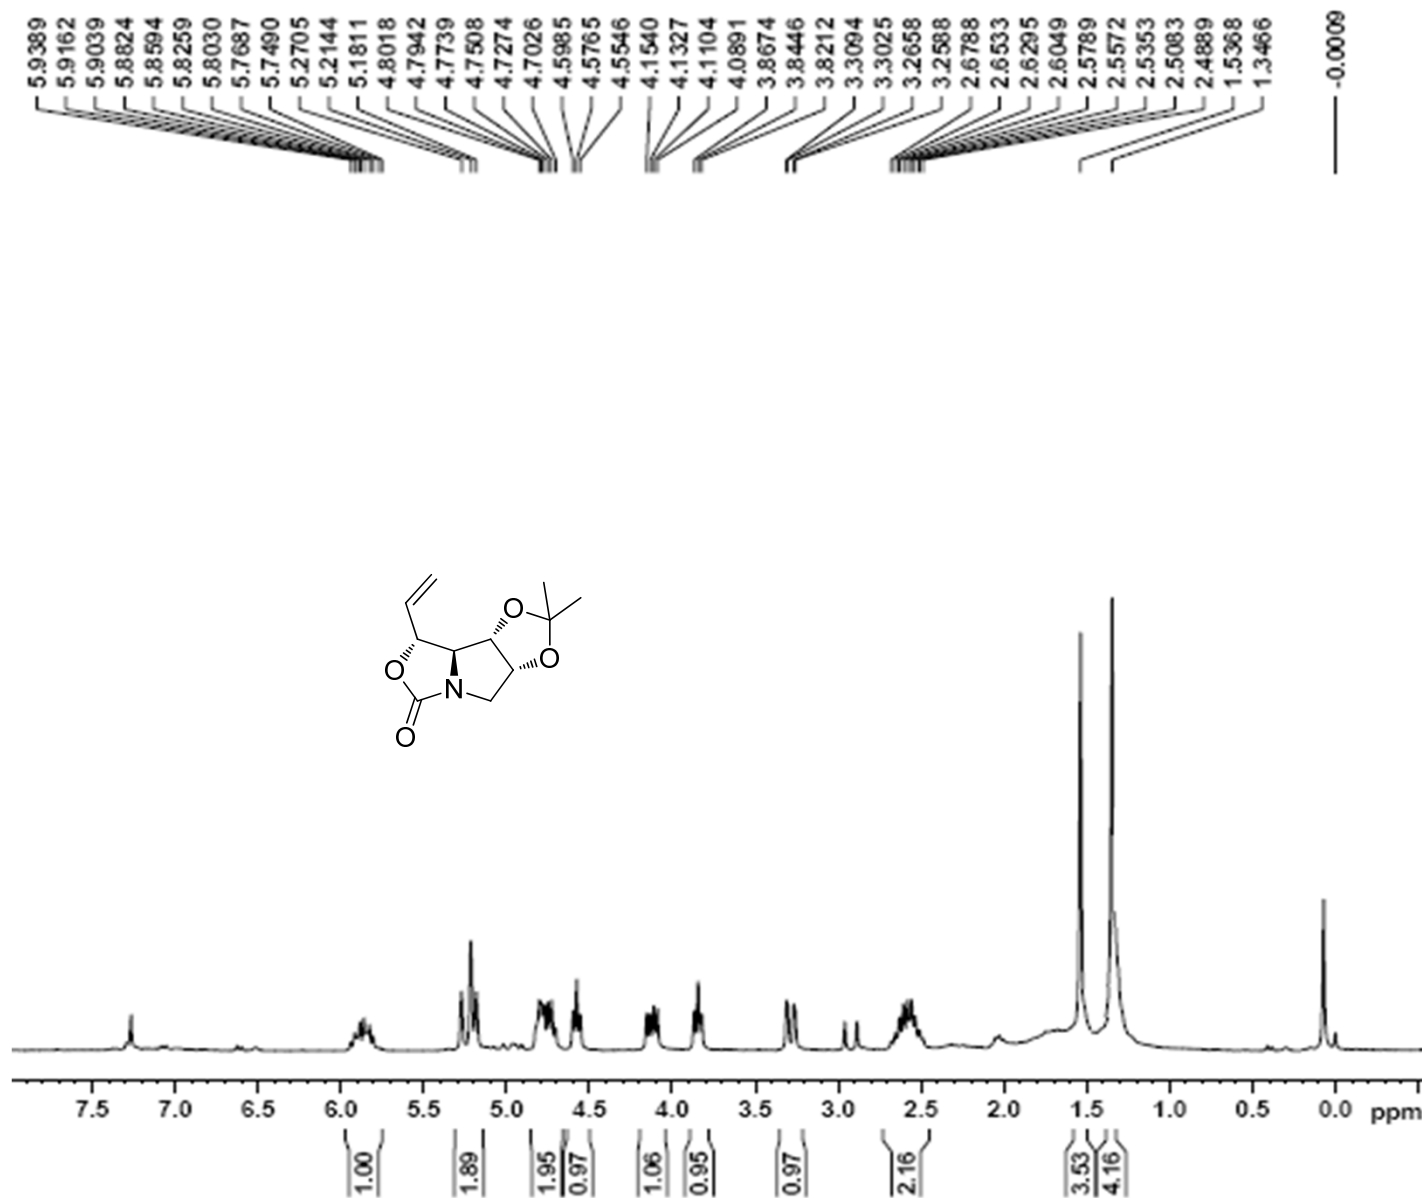

Current Data Parameters  
NAME priya A03  
EXPNO 340  
PROCNO 1

F2 - Acquisition Parameters  
Date\_ 20130506  
Time\_ 0.30  
INSTRUM spect  
PROBHD 5 mm QNP 1H/13  
PULPROG zg30  
TD 65536  
SOLVENT CDCl3  
NS 8  
DS 0  
SWH 6188.119 Hz  
FIDRES 0.094423 Hz  
AQ 5.2953587 sec  
RG 181  
DW 80.800 usec  
DE 15.00 usec  
TE 673.2 K  
D1 1.00000000 sec  
TD0 1

===== CHANNEL f1 =====  
NUC1 1H  
P1 10.00 usec  
PL1 -1.00 dB  
PL1W 15.02081871 W  
SFO1 300.1318534 MHz

F2 - Processing parameters  
SI 32768  
SF 300.1300060 MHz  
WDW EM  
SSB 0  
LB 0.30 Hz  
GB 0  
PC 1.00

<sup>1</sup>H NMR spectrum (CDCl<sub>3</sub>) of compound 15  
S14

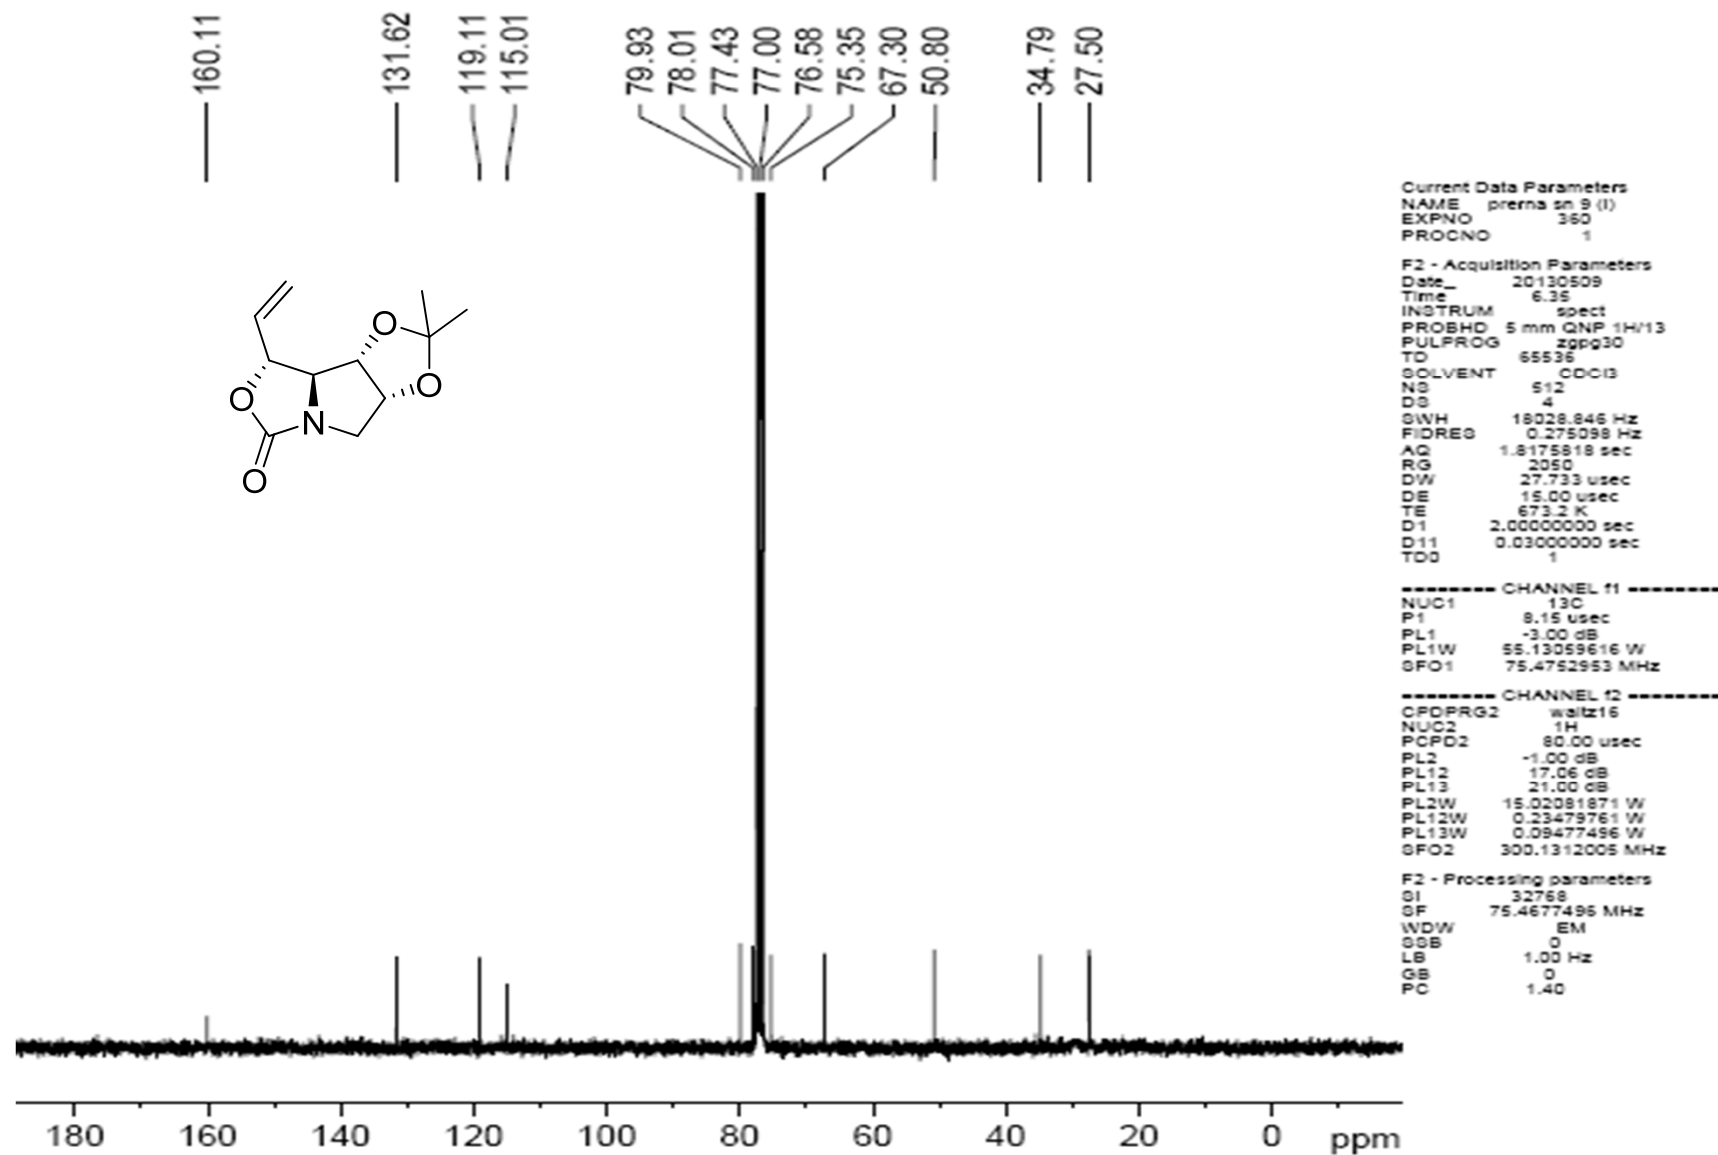

<sup>13</sup>C NMR spectrum (CDCl<sub>3</sub>) of compound 15  
S15







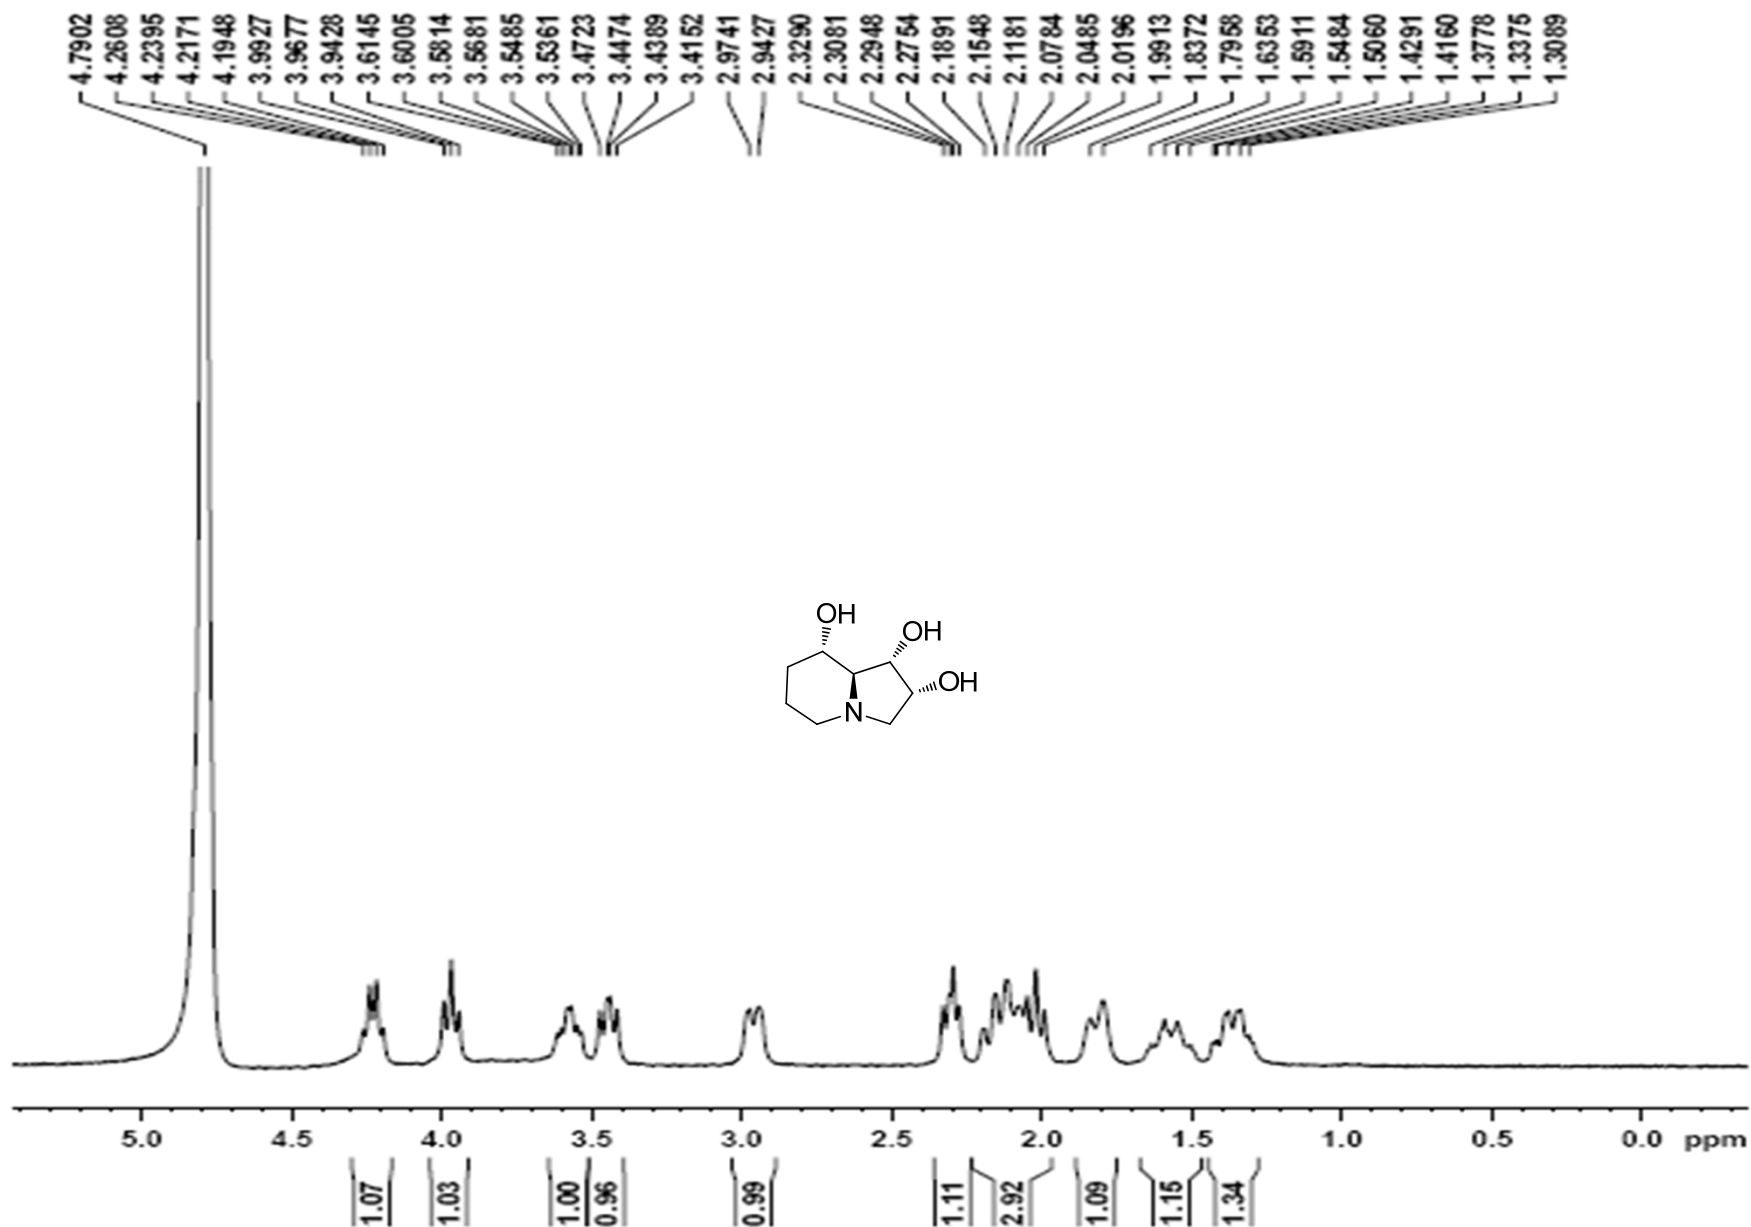

<sup>1</sup>H NMR spectrum (D<sub>2</sub>O) of compound 1

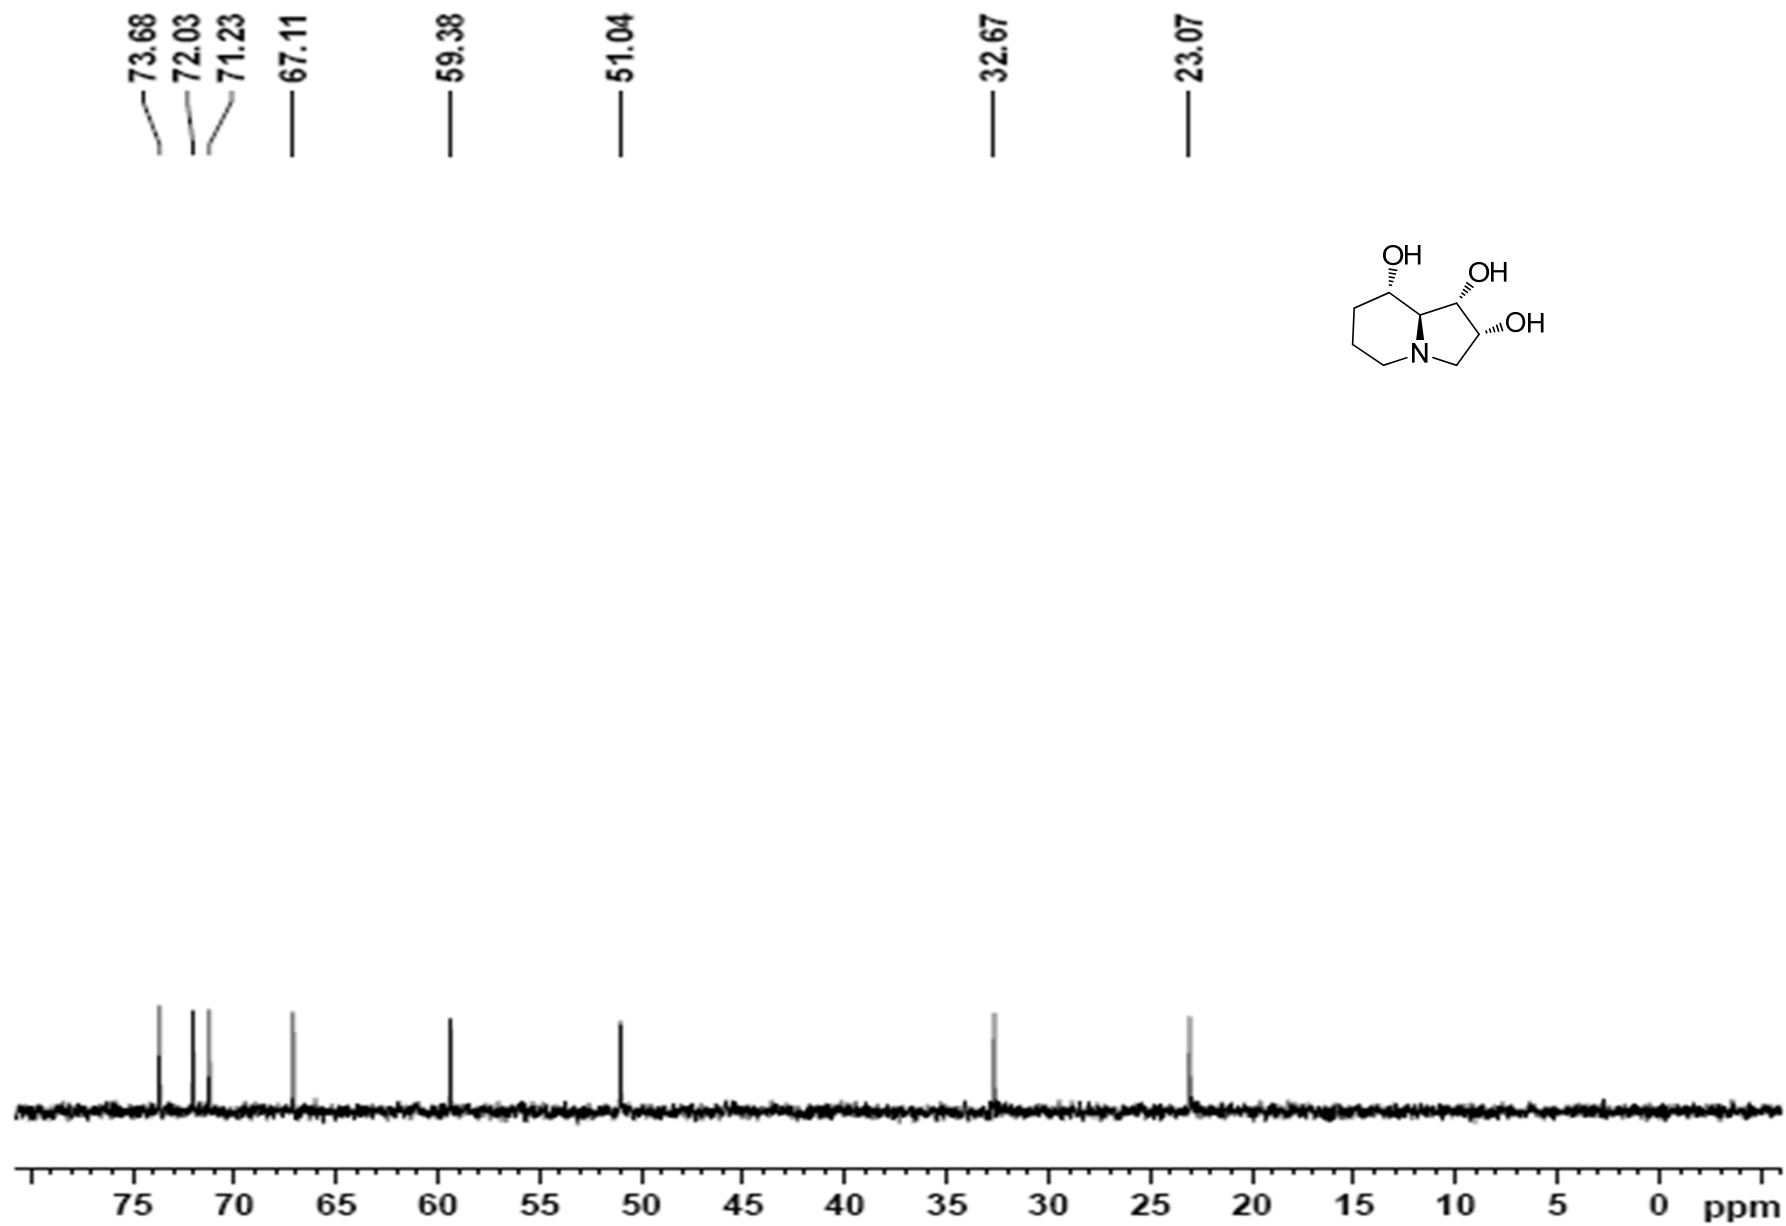

$^{13}\text{C}$  NMR spectrum ( $\text{D}_2\text{O}$ ) of compound **1**  
S19
